# Supplementary material for: Role of Mg2+ and In3+ substitution on magnetic, magnetostrictive and dielectric properties of NiFe2O4 ceramics derived from nanopowders
Source: Royal Society of Chemistry journal article supplement (doi:10.1039/d0cp05448h), 2020-12-29
Supplement: d0cp05448h1.pdf [file d0cp05448h1.pdf]

## Electronic Supporting Information on

# Role of Mg<sup>2+</sup> and In<sup>3+</sup> substitution on magnetic, magnetostrictive and dielectric properties of NiFe<sub>2</sub>O<sub>4</sub> ceramics derived from nanopowders

P. N. Anantharamaiah <sup>a,\*</sup>, B. Prerna Rao <sup>b</sup>, H. M. Shashanka<sup>a</sup>, J. A. Chelvane<sup>c</sup>, V. Khopkar<sup>d</sup>,  
B. Sahoo<sup>d,\*</sup>

<sup>a</sup>Department of Chemistry, Faculty of Mathematical and Physical Sciences, M. S. Ramaiah University of Applied Sciences, Bangalore 560058, India

<sup>b</sup>Department of Physics, Faculty of Mathematical and Physical Sciences, M. S. Ramaiah University of Applied Sciences, Bangalore 560058, India

<sup>c</sup>Advanced Magnetic Group, Defence Metallurgical Research Laboratory, Kanchanbagh, Hyderabad, 500058, India

<sup>d</sup>Materials Research Centre, Indian Institute of Science, Bangalore 560012, India

**Table S1.** Ionic size of the different metal ions.

| Ion              | Ionic radii (Å)    |                    |
|------------------|--------------------|--------------------|
|                  | 4-fold environment | 6-fold environment |
| Mg <sup>2+</sup> | 0.57               | 0.72               |
| Fe <sup>3+</sup> | 0.49               | 0.645              |
| In <sup>3+</sup> | 0.62               | 0.80               |

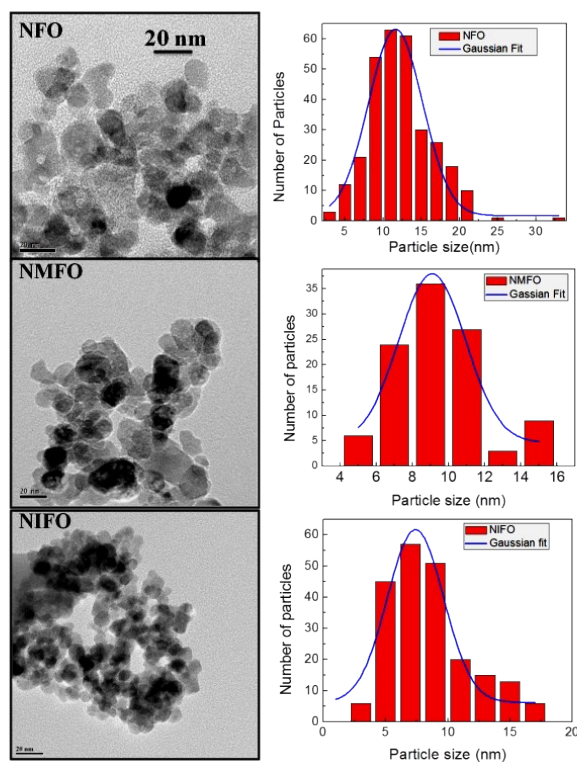

**Fig. S1.** TEM images and the corresponding particle size distribution histograms of NFO, NIFO and NMFO samples, calcined at 500 °C for 2 hours. Note that the size distribution is obtained by considering many TEM micrographs.

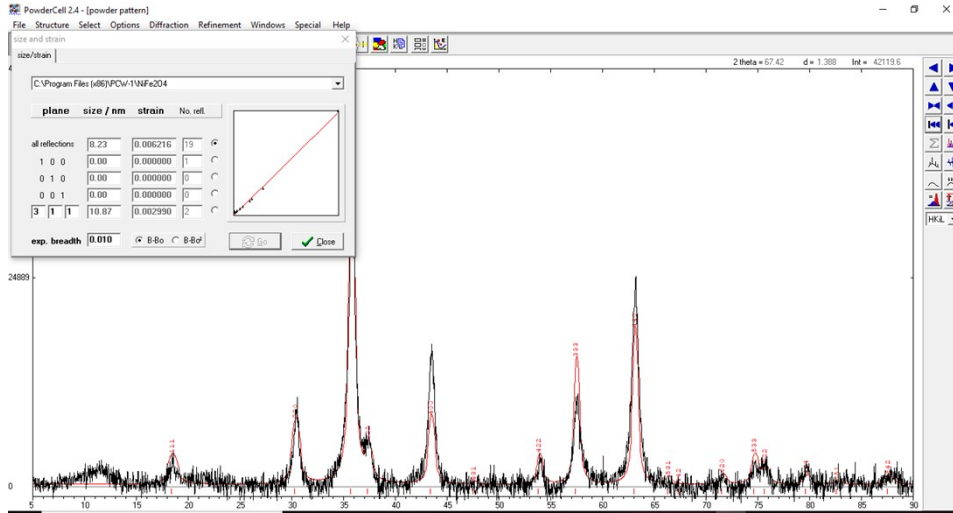

**Fig. S2.** Fitted XRD pattern of the calcined NFO sample, using PCW (powder cell for windows).

**Table S2:** Rietveld fitting parameters, lattice parameter and theoretical density of sintered  $\text{NiFe}_2\text{O}_4$ ,  $\text{NiFe}_{1.8}\text{In}_{0.2}\text{O}_4$  and  $\text{NiFe}_{1.8}\text{Mg}_{0.2}\text{O}_4$ .

| Sample                                       | a (Å)  | $R_p$ (%) | $R_{wp}$ (%) | $\chi^2$ | 'a' (Å) | $D_{\text{theor.}}$ (g/cm <sup>3</sup> ) |
|----------------------------------------------|--------|-----------|--------------|----------|---------|------------------------------------------|
| $\text{NiFe}_2\text{O}_4$                    | 8.3395 | 1.25      | 1.6          | 2.60     | 8.3395  | 5.36                                     |
| $\text{NiFe}_{1.8}\text{In}_{0.2}\text{O}_4$ | 8.3739 | 1.5       | 2.0          | 3.36     | 8.3739  | 5.56                                     |
| $\text{NiFe}_{1.8}\text{Mg}_{0.2}\text{O}_4$ | 8.3469 | 1.3       | 1.8          | 3.23     | 8.3469  | 5.46                                     |

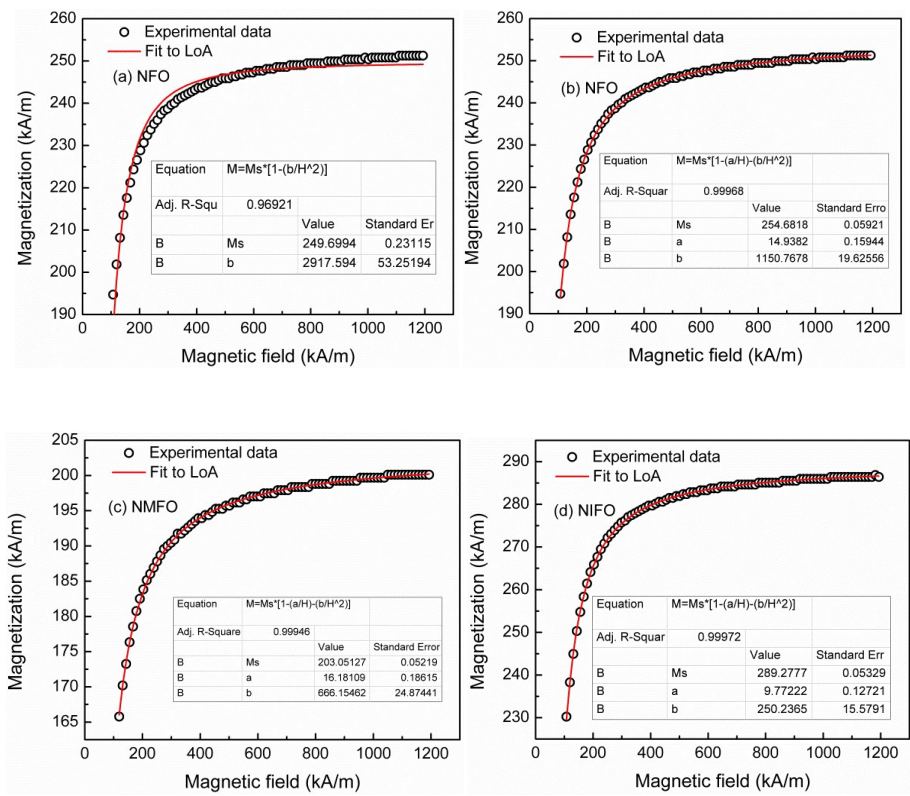

**Fig. S3:** Fit to the initial magnetization curves using the law of approach to saturation method.
